# Supplementary material
Source: PubMed Central journal article supplement (PMC7906710)
Supplement: mmc1.pdf [file mmc1.pdf]

# THE LANCET

## Healthy Longevity

### Supplementary appendix

This appendix formed part of the original submission and has been peer reviewed. We post it as supplied by the authors.

Supplement to: Sablerolles RSG, Lafeber M, van Kempen JAL, et al. Association between Clinical Frailty Scale score and hospital mortality in adult patients with COVID-19 (COMET): an international, multicentre, retrospective, observational cohort study. *Lancet Healthy Longev* 2021; published online Feb 9. [https://doi.org/10.1016/S2666-7568\(21\)00006-4](https://doi.org/10.1016/S2666-7568(21)00006-4).

**Supplemental table 1 Analysis comparing patients with and without a CFS**

|                                                     | <b>CFS Sample</b>     | <b>Non-CFS sample</b> |                |
|-----------------------------------------------------|-----------------------|-----------------------|----------------|
|                                                     | <b>Total (n=2434)</b> | <b>Total (n=3102)</b> | <b>p-value</b> |
| Age (years)                                         | 67 [55-77]            | 69 [58-78]            | <0.0001        |
| <65 years                                           | 1096 (45%)            | 1222 (39%)            | <0.0001        |
| 65-75 years                                         | 589 (24%)             | 774 (25%)             |                |
| >75 years                                           | 749 (31%)             | 1106 (36%)            |                |
| Male gender                                         | 1480 (61%)            | 1947 (63%)            | 0.13           |
| Concomitant drugs                                   |                       |                       |                |
| <i>Blood pressure-lowering drugs</i>                | 1136 (47%)            | 1665 (54%)            | <0.0001        |
| <i>Antiplatelet drugs</i>                           | 405 (17%)             | 699 (23%)             | <0.0001        |
| <i>Oral anticoagulants</i>                          | 272 (11%)             | 373 (12%)             | 0.33           |
| <i>Glucose-lowering drugs</i>                       | 437 (18%)             | 636 (21%)             | 0.018          |
| <i>Antipsychotics and cholinesterase inhibitors</i> | 143 (6%)              | 136 (4%)              | 0.013          |
| Number of drug classes                              | 3 [1-7]               | 5 [2-9]               | <0.0001        |
| Clinical outcome                                    |                       |                       |                |
| <i>Hospital mortality</i>                           | 456 (19%)             | 653 (21%)             | 0.032          |
| <i>ICU admission</i>                                | 616 (25%)             | 700 (23%)             | 0.13           |

*Displayed values are median [interquartile range] and n (%), p-values are estimated using Mann Whitney U test and chi-square test for continuous and categorical variables where necessary.*

**Supplemental Table 2 Baseline characteristics of the total sample for patients <65 and ≥65 years, separately**

|                                              | <65 years<br>Total (n=1096) | ≥65 years<br>Total (n=1338) | p-value |
|----------------------------------------------|-----------------------------|-----------------------------|---------|
| Age (years)                                  | 53 [45-60]                  | 76 [71-83]                  | NA      |
| < 65 years                                   | 1096                        |                             | NA      |
| 65-75 years                                  |                             | 589                         |         |
| >75 years                                    |                             | 749                         |         |
| Male gender                                  | 700 (64%)                   | 780 (58%)                   | 0.0050  |
| Concomitant drugs                            |                             |                             |         |
| Blood pressure-lowering drugs                | 285 (26%)                   | 851 (64%)                   | <0.0001 |
| Antiplatelet drugs                           | 81 (7%)                     | 324 (24%)                   | <0.0001 |
| Oral anticoagulants                          | 32 (3%)                     | 240 (18%)                   | <0.0001 |
| Glucose-lowering drugs                       | 130 (12%)                   | 307 (23%)                   | <0.0001 |
| Antipsychotics and cholinesterase inhibitors | 25 (2%)                     | 118 (9%)                    | <0.0001 |
| Number of drug classes                       | 1 [1-4]                     | 5 [2-9]                     | <0.0001 |
| Clinical Frailty Score                       |                             |                             |         |
|                                              |                             |                             | <0.0001 |
| 1 Very fit                                   | 184 (17%)                   | 69 (5%)                     |         |
| 2 Well                                       | 419 (38%)                   | 258 (19%)                   |         |
| 3 Managing well                              | 189 (17%)                   | 258 (19%)                   |         |
| 4 Vulnerable                                 | 125 (11%)                   | 241 (18%)                   |         |
| 5 Mildly frail                               | 54 (5%)                     | 144 (11%)                   |         |
| 6 Moderately frail                           | 37 (3%)                     | 145 (11%)                   |         |
| 7 Severely frail                             | 47 (4%)                     | 147 (11%)                   |         |
| 8 Very severely frail                        | 37 (3%)                     | 62 (5%)                     |         |
| 9 Terminally ill                             | 4 (1%)                      | 14 (1%)                     |         |
| Clinical outcome                             |                             |                             |         |
| Hospital mortality                           | 53 (5%)                     | 403 (30%)                   | <0.0001 |
| ICU admission                                | 290 (26%)                   | 326 (24%)                   | 0.26    |

*Displayed values are median [interquartile range] and n (%). P-values are based on Mann-Whitney U test for continuous variables, and Fisher's exact test for categorical variables. NA are p-values that are non-informative and are therefore omitted from the table.*

**Supplemental Table 3 Baseline characteristics of the total sample for each CFS category, separately**

| <b>Clinical Frailty Scale</b>                       | <i>Fit [CFS 1-3]</i><br><b>(n=1377)</b> | <i>Mildly frail [CFS 4-5]</i><br><b>(n=564)</b> | <i>Frail [CFS 6-9]</i><br><b>(n=493)</b> | <b>p-value</b> |
|-----------------------------------------------------|-----------------------------------------|-------------------------------------------------|------------------------------------------|----------------|
| Age (years)                                         | 62 [51-72]                              | 73 [60-81]                                      | 75 [65-84]                               | <0.0001        |
| <65 years                                           | 792 (57%)                               | 179 (32%)                                       | 125 (25%)                                | <0.0001        |
| 65-75 years                                         | 330 (24%)                               | 136 (24%)                                       | 123 (25%)                                |                |
| >75 years                                           | 255 (18%)                               | 249 (44%)                                       | 245 (50%)                                |                |
| Male gender                                         | 853 (62%)                               | 329 (58%)                                       | 298 (60%)                                | 0.33           |
| Concomitant drugs                                   |                                         |                                                 |                                          |                |
| <i>Blood pressure-lowering drugs</i>                | 537 (39%)                               | 304 (54%)                                       | 295 (60%)                                | <0.0001        |
| <i>Antiplatelet drugs</i>                           | 179 (13%)                               | 122 (22%)                                       | 104 (21%)                                | <0.0001        |
| <i>Oral anticoagulants</i>                          | 116 (8%)                                | 72 (13%)                                        | 84 (17%)                                 | <0.0001        |
| <i>Glucose-lowering drugs</i>                       | 198 (14%)                               | 131 (23%)                                       | 108 (22%)                                | <0.0001        |
| <i>Antipsychotics and cholinesterase inhibitors</i> | 37 (2%)                                 | 37 (7%)                                         | 69 (14%)                                 | <0.0001        |
| Number of drug classes                              | 2 [1-6]                                 | 5 [1-8]                                         | 5 [2-9]                                  | <0.0001        |
| Clinical outcome                                    |                                         |                                                 |                                          |                |
| <i>Hospital mortality</i>                           | 142 (10%)                               | 132 (23%)                                       | 182 (37%)                                | <0.0001        |
| <i>ICU admission</i>                                | 353 (26%)                               | 104 (18%)                                       | 159 (32%)                                | <0.0001        |

*Displayed values are median [interquartile range] and n (%). P-values are based on one-way ANOVA for continuous variables and Fisher's exact test for categorical variables.*

**Supplemental Table 4 Binary logistic regression presenting all the estimates (Odds Ratios) and 95% Confidence intervals with hospital mortality as the outcome**

| Hospital mortality                        | Model IV                | Model IV                | Model IV                |
|-------------------------------------------|-------------------------|-------------------------|-------------------------|
|                                           | Total sample            | <65 years               | ≥65 Years               |
| Mildly frail [CFS4-5]; ref is Fit[CFS1-3] | <b>1·54 (1·16-2·06)</b> | 1·08 (0·48-2·39)        | <b>1·64 (1·20-2·25)</b> |
| Frail [CFS6-9]; ref is Fit[CFS1-3]        | <b>2·71 (2·04-3·60)</b> | <b>2·22 (1·08-4·57)</b> | <b>2·90 (2·12-3·97)</b> |
| Male                                      | <b>2·04 (1·59-2·63)</b> | <b>2·01 (1·00-4·04)</b> | <b>2·04 (1·56-2·67)</b> |
| Age                                       | <b>2·00 (1·80-2·24)</b> | <b>1·85 (1·24-2·75)</b> | <b>1·74 (1·46-2·08)</b> |
| Polypharmacy                              | <b>1·05 (1·01-1·09)</b> | <b>1·15 (1·06-1·26)</b> | 1·02 (0·98-1·06)        |
| Blood pressure-lowering drugs             | 1·14 (0·86-1·51)        | 0·54 (0·25-1·17)        | 1·26 (0·92-1·71)        |
| Antiplatelet drugs                        | 1·02 (0·75-1·39)        | 0·67 (0·24-1·91)        | 1·13 (0·81-1·56)        |
| Oral anticoagulants                       | 1·04 (0·74-1·39)        | 1·59 (0·50-5·96)        | 1·05 (0·74-1·49)        |
| Glucose-lowering drugs                    | 0·99 (0·74-1·34)        | 1·32 (0·60-2·90)        | 0·90 (0·66-1·24)        |
| Cholinesterase inhibitors                 | 1·44 (0·96-2·16)        | 2·72 (0·86-8·57)        | 1·30 (0·85-2·00)        |
| N                                         | 2367                    | 1069                    | 1298                    |
| Nagelkerke R-square                       | 0·3                     | 0·15                    | 0·16                    |
| -2 Loglikelihood                          | -1837·85                | -367·68                 | -1449·07                |
| Chi-square (df, p-value)                  | 482·00 (10, <0·001)     | 54·09 (10, <0·001)      | 159·11 (10, <0·001)     |

*Note: Bold values are significant at 5% alpha level.*

**Supplemental Table 5 Binary logistic regression presenting all the estimates (Odds Ratios) and 95% Confidence intervals with ICU admission as the outcome**

| ICU admission                             | Model IV                | Model IV                | Model IV                |
|-------------------------------------------|-------------------------|-------------------------|-------------------------|
|                                           | Total sample            | <65 years               | ≥65 Years               |
| Mildly frail [CFS4-5]; ref is Fit[CFS1-3] | <b>0.71 (0.55-0.92)</b> | 0.93 (0.63-1.38)        | <b>0.66 (0.47-0.93)</b> |
| Frail [CFS6-9]; ref is Fit[CFS1-3]        | <b>1.54 (1.21-1.97)</b> | <b>2.96 (1.98-4.43)</b> | 1.27 (0.92-1.75)        |
| Male; ref is female                       | <b>2.03 (1.65-2.48)</b> | <b>2.06 (1.50-2.83)</b> | <b>1.75 (1.33-2.31)</b> |
| Age                                       | 1.00 (0.94-1.08)        | <b>1.47 (1.25-1.72)</b> | <b>0.56 (0.46-0.68)</b> |
| Polypharmacy                              | 0.98 (0.95-1.01)        | 1.00 (0.94-1.06)        | 0.97 (0.93-1.01)        |
| Blood pressure-lowering drugs             | <b>1.35 (1.06-1.71)</b> | 0.95 (0.64-1.40)        | <b>1.50 (1.10-2.06)</b> |
| Antiplatelet drugs                        | <b>0.72 (0.54-0.97)</b> | 0.87 (0.50-1.53)        | <b>0.69 (0.48-0.99)</b> |
| Oral anticoagulants                       | <b>0.60 (0.42-0.86)</b> | 0.56 (0.23-1.36)        | 0.70 (0.47-1.04)        |
| Glucose-lowering drugs                    | 1.02 (0.78-1.34)        | 1.07 (0.67-1.72)        | 0.86 (0.61-1.20)        |
| Cholinesterase inhibitors                 | 0.63 (0.39-1.00)        | 0.92 (0.34-2.46)        | 0.70 (0.40-1.22)        |
| N                                         | 2418                    | 1091                    | 1327                    |
| Nagelkerke R-square                       | 0.06                    | 0.11                    | 0.11                    |
| -2 Loglikelihood                          | -12646.23               | -1175.15                | -1381.33                |
| Chi-square (df, p-value)                  | 98.20 (10, <0.001)      | 88.34 (10, <0.001)      | 98.34 (10, <0.001)      |

*Note: Bold values are significant at 5% alpha level.*

**Supplemental Table 6 Binary regression analysis using CFS as a continuous variable**

| <i>Study endpoint</i>    |     | <i>No. of events</i> | <i>Clinical frailty score</i>                                                                  |                |
|--------------------------|-----|----------------------|------------------------------------------------------------------------------------------------|----------------|
|                          |     |                      | <i>OR (95%CI)</i><br><i>Per 1 increase</i><br><i>Clinical Frailty Score</i><br><i>(n=2434)</i> | <i>p-value</i> |
| Hospital mortality       | I   | 456                  | 1.44 (1.37 - 1.52)                                                                             | <0.0001        |
|                          | II  |                      | 1.30 (1.22 - 1.37)                                                                             | <0.0001        |
|                          | III |                      | 1.28 (1.21 - 1.36)                                                                             | <0.0001        |
|                          | IV  |                      | 1.27 (1.20 - 1.35)                                                                             | <0.0001        |
| Intensive care admission | I   | 616                  | 1.08 (1.04 - 1.13)                                                                             | <0.0001        |
|                          | II  |                      | 1.11 (1.05 - 1.16)                                                                             | <0.0001        |
|                          | III |                      | 1.12 (1.06 - 1.17)                                                                             | <0.0001        |
|                          | IV  |                      | 1.12 (1.07 - 1.18)                                                                             | <0.0001        |

*Model*

*I: Crude*

*II: Adjusted for sex, age*

*III: II + additional adjustment for number of drugs*

*IV: III + additional adjustment for blood pressure-lowering drugs, antiplatelet drugs, oral anticoagulants, glucose-lowering drugs, antipsychotics, and cholinesterase inhibitors*

*\*Estimates are Odds Ratios (OR) and their respective 95% Confidence Intervals (95% CI)*

**Supplemental Table 7 Binary logistic regression analysis when including BMI as an additional covariate in the extended model IV**

| Outcome                                    | Hospital mortality            |                              |                               | ICU admission                 |                              |                              |
|--------------------------------------------|-------------------------------|------------------------------|-------------------------------|-------------------------------|------------------------------|------------------------------|
|                                            | Total                         | <65 years                    | ≥65 Years                     | Total                         | <65 years                    | ≥65 Years                    |
| Sample                                     | IV                            | IV                           | IV                            | IV                            | IV                           | IV                           |
| Mildly frail [CFS4-5]; ref is Fit [CFS1-3] | <b>1·56 (1·13-2·15)</b>       | 1·13 (0·84-2·65)             | <b>1·69 (1·19-2·42)</b>       | 0·65 (0·50-0·86)              | 0·80 (0·52-1·22)             | <b>0·63 (0·43-0·92)</b>      |
| Frail [CFS6-9]; ref is Fit [CFS1-3]        | <b>2·43-1·74-3·38)</b>        | 2·13 (0·92-4·92)             | <b>2·62 (1·82-3·79)</b>       | <b>1·66 (1·26-2·19)</b>       | <b>2·92 (1·80-4·73)</b>      | <b>1·45 (1·01-2·08)</b>      |
| Male; ref is female                        | <b>2·97 (1·64-2·94)</b>       | 1·86 (0·87-3·98)             | <b>2·24 (1·64-3·06)</b>       | <b>2·09 (1·67-2·62)</b>       | <b>2·14 (1·51-3·04)</b>      | <b>1·81 (1·32-2·47)</b>      |
| Age                                        | <b>1·87 (1·65-2·13)</b>       | <b>1·85 (1·19-2·87)</b>      | <b>1·52 (1·23-1·88)</b>       | 1·00 (0·92-1·08)              | <b>1·48 (1·25-1·76)</b>      | <b>0·51 (0·40-0·64)</b>      |
| Pre-obesity; ref is normal                 | <b>1·66 (1·20-2·28)</b>       | 2·00 (0·89-4·47)             | <b>1·54 (1·08-2·19)</b>       | <b>1·70 (1·32-2·18)</b>       | <b>1·92 (1·21-2·81)</b>      | 1·25 (0·89-1·77)             |
| Obesity; ref is normal                     | <b>1·57 (1·13-2·19)</b>       | 1·51 (0·64-3·55)             | <b>1·54 (1·07-2·22)</b>       | <b>1·51 (1·17-1·96)</b>       | <b>1·98 (1·34-2·92)</b>      | 0·98 (0·68-1·43)             |
| Polypharmacy                               | <b>1·06 (1·02-1·10)</b>       | <b>1·17 (1·06-1·29)</b>      | 1·03 (0·99-1·08)              | 0·98 (0·95-1·03)              | 1·00 (0·94-1·07)             | 0·98 (0·94-1·03)             |
| Blood pressure-lowering drugs              | 1·06 (0·77-1·46)              | 0·49 (0·21-1·16)             | 1·19 (0·93-1·69)              | 1·24 (0·95-1·62)              | 0·84 (0·55-1·28)             | <b>1·51 (1·06-2·16)</b>      |
| Antiplatelet drugs                         | 0·99 (0·70-1·40)              | 0·57 (0·18-1·82)             | 1·14 (0·79-1·65)              | 0·73 (0·53-1·01)              | 0·74 (0·41-1·37)             | 0·74 (0·50-1·10)             |
| Oral anticoagulants                        | 1·07 (0·74-1·56)              | 1·81 (0·54-6·06)             | 1·09 (0·73-1·62)              | 0·56 (0·38-0·82)              | 0·44 (0·17-1·15)             | 0·70 (0·54-1·16)             |
| Glucose-lowering drugs                     | 1·00 (0·72-1·39)              | 1·55 (0·67-3·61)             | 0·84 (0·58-1·21)              | 0·92 (0·69-1·24)              | 0·94 (0·57-1·57)             | 0·79 (0·54-1·16)             |
| Cholinesterase inhibitors                  | 1·49 (0·93-2·38)              | 2·87 (0·81-10·18)            | 1·30 (0·79-2·15)              | 0·69 (0·41-1·16)              | 1·11 (0·39-3·18)             | 0·70 (0·37-1·30)             |
| N                                          | 1882                          | 858                          | 1024                          | 1929                          | 877                          | 1052                         |
| Nagelkerke R-square                        | 0·26                          | 0·19                         | 0·14                          | 0·08                          | 0·14                         | 0·13                         |
| -2 Loglikelihood                           | -1445·38                      | -301·94                      | -1117·76                      | -2161·41                      | -976·18                      | -1108·73                     |
| Chi-square (df, p-value)                   | <b>317·49 (12, &lt;0·001)</b> | <b>56·74 (12, &lt;0·001)</b> | <b>100·89 (12, &lt;0·001)</b> | <b>110·69 (12, &lt;0·001)</b> | <b>88·23 (12, &lt;0·001)</b> | <b>95·89 (12, &lt;0·001)</b> |

*Note: Bold values are significant at 5% alpha level.*



**Supplemental Table 8 Binary logistic regression for the association between CFS and hospital mortality stratified for whether the patient was admitted at the ICU during the COVID-19 hospitalisation**

| Outcome<br>Stratification<br>Model         | Hospital mortality      |                         |
|--------------------------------------------|-------------------------|-------------------------|
|                                            | ICU admission           | No ICU admission        |
|                                            | IV                      | IV                      |
| Mildly frail [CFS4-5]; ref is Fit [CFS1-3] | 1.33 (0.78-2.27)        | <b>1.90 (1.31-2.75)</b> |
| Frail [CFS6-9]; ref is Fit [CFS1-3]        | <b>1.81 (1.14-2.87)</b> | <b>3.23 (2.22-4.72)</b> |
| Male                                       | <b>1.84 (1.14-2.96)</b> | <b>1.86 (1.37-2.54)</b> |
| Age                                        | <b>1.80 (1.49-2.17)</b> | <b>2.47 (2.11-2.90)</b> |
| Polypharmacy                               | 1.05 (0.99-1.12)        | 1.05 (1.00-1.10)        |
| Blood pressure-lowering drugs              | 0.85 (0.53-1.37)        | 1.28 (0.88-1.86)        |
| Antiplatelet drugs                         | 0.97 (0.54-1.75)        | 1.13 (0.78-1.65)        |
| Oral anticoagulants                        | 1.19 (0.62-2.30)        | 1.03 (0.68-1.55)        |
| Glucose-lowering drugs                     | 1.15 (0.68-1.95)        | 0.95 (0.65-1.38)        |
| Cholinesterase inhibitors                  | 1.94 (0.72-5.22)        | 1.45 (0.91-2.29)        |
| N                                          | 570                     | 1781                    |
| Nagelkerke R-square                        | 0.19                    | 0.38                    |
| -2 Loglikelihood                           | -603.77                 | -1127.63                |
| Chi-square (df, p-value)                   | 80.34 (10, <0.001)      | 448.52 (10, <0.001)     |

*Note: Bold values are significant at 5% alpha level.*

### **Supplemental file 1 List of authors COMET research team**

The following list entails all the authors of the COMET research team. They are ordered by country, hospital, and each participant belonging to a hospital.

#### **Aruba**

*Dr Horacio E Oduber hospitaal, Oranjestad:* Jacomien Aleman (PharmD).

#### **Austria**

*Vienna General Hospital - Medical University Campus, Vienna:* Fiona Nagele (MPharm), Gunar Stermer (MPharm).

*Klinik Favoriten, Vienna:* Doris Haider (PharmD), Katharina Heitzeneder (MPharm), Nikolaus Lindner (MPharm), Andrea Lubich (PhD), Monika Schwap (MPharm).

*Klinik Penzing, Vienna:* Christine Müller (MPharm), Konstanze Duchek-Mann (MPharm), Marietta Huebler (MPharm).

*Klinik Donaustadt, Vienna:* Rosalinda Cabuk (MPharm), Theresa Forsthuber (MPharm), Karin Nemeč (PharmD).

#### **Belgium**

*University Hospitals Leuven, Leuven:* Jos Tournoy (MD), Lorenz Van der Linden (PharmD).

#### **Curacao**

*Curaçao MC, Willemstad:* Zohreh Safipour (PharmD).

#### **Denmark**

*Hvidovre Hospital, Copenhagen:* Anne Kathrine Benggaard (PharmD).

*Copenhagen University Hospital Amager and Hvidovre, Hvidovre:* Morten Baltzer Houlinde (PharmD).

#### **France**

*Bichat-Claude-Bernard, Paris:* Grégoire Callens (BSc), Jennifer Le Grand (PharmD), Michaël Kemogni (pharmacy student), Marc Veyrier (PharmD).

*Hôpital Beaujon, Clichy:* Guillaume Cohet (PharmD), Gaëlle OKA (PharmD), Nathalie Pons-Kerjean (PharmD).

#### **Germany**

*Universitätsklinikum Düsseldorf, Düsseldorf:* Anneke Maiworm (PharmD).

#### **Italy**

*Ospedale Bufalini di Cesena -AUSL della Romagna, Cesena:* Francesca Caruso (PharmD), Carito Zenico (PharmD). *Morgagni Forlì, Forlì:* Fabio Pieraccini (PharmD).

*Carlo Urbani Hospital, Jesi (AN):* Katia Bini (PharmD), Marco Candela (MD), Anna Maria Schimizzi (MD), Marco Di Carlo (MD), Roberto Grinta (PharmD), Fausto Salaffi (MD), Marika Tardella (MD), Federica Verri (PhD).

*Istituto Scientifico Romagnolo per lo Studio e per la Cura dei Tumori I.R.S.T. IRCCS, Ospedale Sacro Cuore Don Calabria, Verona:* Carla Masini (PharmD), Gloria Boni (PharmD), Zeno Bisoffi (MD), Roberto Tessari (PharmD), Francesca Marchesini (PharmD), Teresa Zuppini (Hospital Pharmacy Director).

*San Francesco Hospital, Nuoro:* Paola Chessa (PharmD).

*Pederzoli Hospital, Peschiera del Garda, VR:* Marco Gambera (PharmD), Isabella Martignoni (PharmD).

*Santa Maria delle Croci, Ravenna:* Giovanna Rametta (PharmD).

*"Infermi" Hospital, Rimini:* Laura Fantini (PharmD), Francesco Pappalardo (PharmD), Elisa Maria Platania (PharmD), Lucia Rossi (PharmD).

*Azienda ospedaliero-universitaria Sant'Andrea, Rome:* Giorgia Gambarelli (PharmD), Silvia Berlinghini (PharmD), Simone Pagliarino (PharmD), Martina Canonici (PharmD), Eleonora Capone (PharmD), Caterina Maesano (PharmD), Gabriella Martini (PharmD), Elena Loche (PharmD).

*Azienda Ulss 5 Veneto, Rovigo:* Laura Agnoletto (PharmD).

*Hospital Pharmacy - Hospital Santa Maria della Misericordia di Urbino, Urbino:* Silvia Andreassi (MD), Michela Maragna (MD), Manola Peverini (PharmD), Celestino Bufarini (PharmD).

## **the Netherlands**

*Noordwest Ziekenhuisgroep, Alkmaar:* Ingrid van Haelst (PhD).  
*Meander MC, Amersfoort:* Louise Andrews (PharmD), Eefje Jong (MD).  
*Amsterdam UMC, AMC, Amsterdam:* Marleen Kemper (PharmD), Ferdi Sombogaard (PharmD), Roland van den Berg (PharmD), Elise Slob (PharmD).  
*Farmadam Apotheek, Amsterdam:* Firdaouss Boutkourt (PharmD).  
*Gelre ziekenhuizen, Apeldoorn/Zutphen:* Annemiek Otten-Helmers (BSc), Erik van Kan (PharmD PhD).  
*Rijnstate, Arnhem:* Margreet Filius (PharmD), Wietske Hemminga (PharmD).  
*Rode Kruis Ziekenhuis, Beverwijk:* Caroline Ghazarian (PharmD), Doranne Hilarius (PharmD).  
*Amphia ziekenhuis, Breda:* Ronald Van Etten (MD), Hein van Onzenoort (PharmD), Mariette Kappers (MD), Peter van Wijngaarden (MD), Jose Verstijnen (BSc).  
*Reinier de Graaf Ziekenhuis, Delft:* Ilse Cornelissen-Wesseling (Msc), Jeroen Diepstraten (PharmD), Jacobien Ellerbroek (MD).  
*Haaglanden MC, Den Haag:* Eveline Roelofsen (MSc), Edmé Roobol-Meuwese (MSc).  
*Gelderse Vallei Hospital, Ede:* Peter Wierenga (PharmD).  
*Admiraal de Ruyter Ziekenhuis (ADRZ), Goes:* Rosanne Kranenburg (MD).  
*Treant Zorggroep, Emmen:* Rosalie Moorlag (PharmD), Anja Vos (MD).  
*Beatrixziekenhuis, Gorinchem:* Ingrid Hoogendoorn-de Graaf (PharmD), Judith Verdonk (BSc).  
*St Jansdal, Harderwijk:* Marieke Ebbens (PharmD).  
*Tergooi hospital, Hilversum:* Linda Hendriksen (PharmD), Paul van der Linden (PharmD).  
*MUMC+, Maastricht:* Jos Schols (MD).  
*Canisius Wilhelmina Hospital, Nijmegen:* Hugo de Wit (PharmD), Stefan Russel (MSc).  
*Dijklander ziekenhuis, Amsterdam/Purmerend/Hoorn:* Kaylen Guda (PharmD), Kristel Crommentuijn (PharmD).  
*Erasmus MC, Rotterdam:* Betul Dilek (BSc), Freija Hogenhuis (PharmD).  
*Franciscus Gasthuis & Vlietland, Rotterdam:* Suzanne van Dijk (MD).  
*Maasstad Hospital, Rotterdam:* Tessa Bosch (PharmD), Lisanne Krens (PharmD), Kajie Liang (PharmD), Langeza Saleh (MD), Milou van Heuckelum (MSc).  
*Ommelander Hospital Groningen, Scheemda:* Monique Slijfer (PharmD).  
*Zuyderland MC, Sittard-Geleen:* Debbie Deben (PharmD), Kim Hurkens (MD), Dennis Wong (PharmD), Marion Vromen (MD).  
*Haga Ziekenhuis, Den Haag:* Marieke Ezinga (PharmD), Kees van Nieuwkoop (MD), Loes Visser (PharmD), Liesbeth Bosma (PharmD).  
*Elisabeth TweeSteden ziekenhuis, Tilburg:* Ebbie Boemaars (CPhT), Zahira Getrouw (PharmD), Barbara Maat (PharmD).  
*Máxima MC, Veldhoven:* Luc Derijks (PharmD).  
*VieCuri Medical Centre, Venlo:* Paddy Janssen (PharmD).  
*Streekziekenhuis Koningin Beatrix, Winterswijk:* Arjan Bulsink (PharmD).  
*Isala, Zwolle:* Peter ter Horst (PharmD).

## **Portugal**

*Egas Moniz Hospital, Lisboa:* Margarida Falcao (PharmD), Helena Farinha (PharmD), Dina Mendes (PharmD), Joao Rijo (PharmD).  
*Hospital São Francisco Xavier, Lisboa:* Joana Soares (PharmD), Fatima Falcao (PharmD), Mariana Solano (PharmD), Erica Viegas (PharmD).

## **Spain**

*Vall d'Hebron Hospital, Barcelona:* Marta Miarons (PharmD), Maria Queralt Gorgas (PharmD).  
*University Hospital Infanta Sofía, San Sebastián de los Reyes:* Cristina García Yubero (PharmD), Laura Portillo Horcajada (PharmD).

## **Switzerland**

*FHP Kantonsspital Aarau, Aarau:* Kim Blum (Clinical Pharmacist).  
*Cantonal Hospital of Lucerne, Lucerne:* Kim Keijzers (PharmD), Silke Lim (PharmD).

## **United Kingdom**

*Antrim Area Hospital, Antrim:* Linden Ashfield (MSc), Helen Bell (PharmD), Naomi Fitzhugh (MPharm), Glenda Fleming (PhD), Nicola Goodfellow (MPharm), Joanne Hanley (BSc), Michael Scott (PhD).  
*Cleveland Clinic London, London:* Francine de Stoppelaar (PharmD).  
*Norfolk and Norwich University NHS Foundation Trust, Norwich:* Martyn Patel (PhD), Roisin Mc Menamin (MPharm).

### Clinical Frailty Scale\*

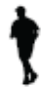

**1 Very Fit** – People who are robust, active, energetic and motivated. These people commonly exercise regularly. They are among the fittest for their age.

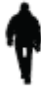

**2 Well** – People who have **no active disease symptoms** but are less fit than category 1. Often, they exercise or are very **active occasionally**, e.g. seasonally.

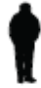

**3 Managing Well** – People whose **medical problems are well controlled**, but are **not regularly active** beyond routine walking.

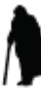

**4 Vulnerable** – While **not dependent** on others for daily help, often **symptoms limit activities**. A common complaint is being “slowed up”, and/or being tired during the day.

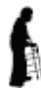

**5 Mildly Frail** – These people often have **more evident slowing**, and need help in **high order IADLs** (finances, transportation, heavy housework, medications). Typically, mild frailty progressively impairs shopping and walking outside alone, meal preparation and housework.

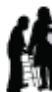

**6 Moderately Frail** – People need help with **all outside activities** and with **keeping house**. Inside, they often have problems with stairs and need **help with bathing** and might need minimal assistance (cuing, standby) with dressing.

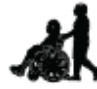

**7 Severely Frail** – **Completely dependent for personal care**, from whatever cause (physical or cognitive). Even so, they seem stable and not at high risk of dying (within ~ 6 months).

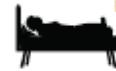

**8 Very Severely Frail** – Completely dependent, approaching the end of life. Typically, they could not recover even from a minor illness.

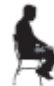

**9. Terminally Ill** - Approaching the end of life. This category applies to people with a **life expectancy <6 months**, who are **not otherwise evidently frail**.

#### Scoring frailty in people with dementia

The degree of frailty corresponds to the degree of dementia. Common **symptoms in mild dementia** include forgetting the details of a recent event, though still remembering the event itself, repeating the same question/story and social withdrawal.

In **moderate dementia**, recent memory is very impaired, even though they seemingly can remember their past life events well. They can do personal care with prompting.

In **severe dementia**, they cannot do personal care without help.

\* 1. Canadian Study on Health & Aging, Revised 2008.  
2. K. Rockwood et al. A global clinical measure of fitness and frailty in elderly people. CMAJ 2005;173:489-495.

© 2007-2009, Version 1.2. All rights reserved. Geriatric Medicine Research, Dalhousie University, Halifax, Canada. Permission granted to copy for research and educational purposes only.
